# Supplementary material for: Selfee, self-supervised features extraction of animal behaviors
Source: eLife journal article supplement (doi:10.7554/elife.76218), 2022-06-16
Supplement: supp [file elife-76218-supp-v1.zip]

Archive with 20 entries (20 files):
- elife_poa_e76218_Figure_1_figure_supplement_1.pdf
- elife_poa_e76218_Figure_1_figure_supplement_2.pdf
- elife_poa_e76218_Figure_1_figure_supplement_3.pdf
- elife_poa_e76218_Figure_2_figure_supplement_1.pdf
- elife_poa_e76218_Figure_3_figure_supplement_1.pdf
- elife_poa_e76218_Figure_3_figure_supplement_2.pdf
- elife_poa_e76218_Figure_3_figure_supplement_3.pdf
- elife_poa_e76218_Figure_3_figure_supplement_4.pdf
- elife_poa_e76218_Figure_3_figure_supplement_5.pdf
- elife_poa_e76218_Figure_4_figure_supplement_1.pdf
- elife_poa_e76218_Figure_6_figure_supplement_1.jpg
- elife_poa_e76218_Figure_6_figure_supplement_2.pdf
- elife_poa_e76218_Figure_1_video_1.mp4
- elife_poa_e76218_Figure_1_video_2.mp4
- elife_poa_e76218_Figure_1_video_3.mp4
- elife_poa_e76218_Figure_3_video_1.mp4
- elife_poa_e76218_Figure_4_video_1.mp4
- elife_poa_e76218_Figure_4_video_2.mp4
- elife_poa_e76218_Figure_5_video_1.mp4
- elife_poa_e76218_Figure_5_video_2.mp4
