# Supplementary material for: Selfee, self-supervised features extraction of animal behaviors
Source: eLife journal article supplement (doi:10.7554/elife.76218), 2022-06-16
Supplement: supp [file elife-76218-supp-v1.zip]

A

Ground truth

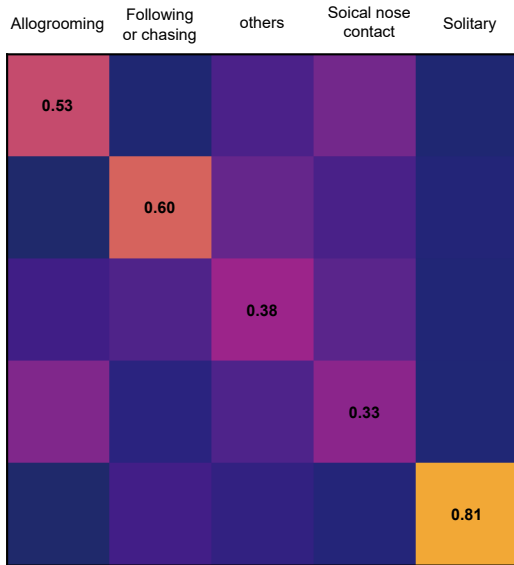

k-NN, diagonal value as recall

B

Inferred labels

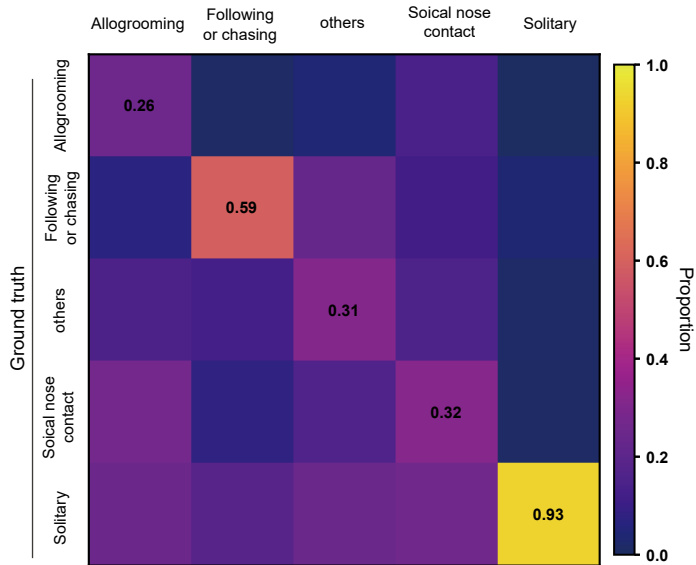

k-NN, diagonal value as precision

Proportion

1.0

0.8

0.6

0.4

0.2

0.0
