# Supplementary material for: Selfee, self-supervised features extraction of animal behaviors
Source: eLife journal article supplement (doi:10.7554/elife.76218), 2022-06-16
Supplement: supp [file elife-76218-supp-v1.zip › elife_poa_e76218_Figure_1_figure_supplement_1.pdf]

**A**

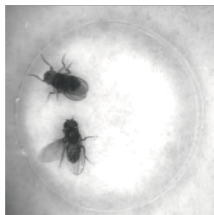

Ground Truth

Wing extension

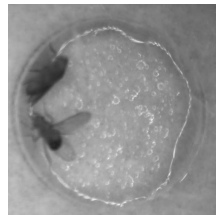

Wing extension

k-NN classification

Wing extension

Copulation

**B**

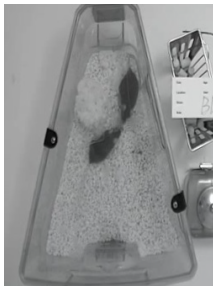

Original

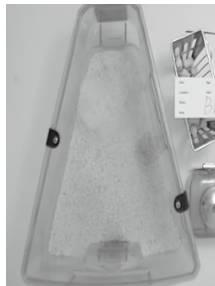

Background

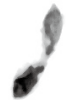

Mice
