# Supplementary material for: Selfee, self-supervised features extraction of animal behaviors
Source: eLife journal article supplement (doi:10.7554/elife.76218), 2022-06-16
Supplement: supp [file elife-76218-supp-v1.zip › elife_poa_e76218_Figure_3_figure_supplement_3.pdf]

**A**

Ground truth

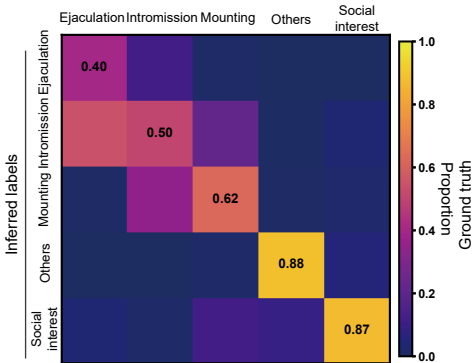

k-NN, diagonal value as recall

**B**

Inferred labels

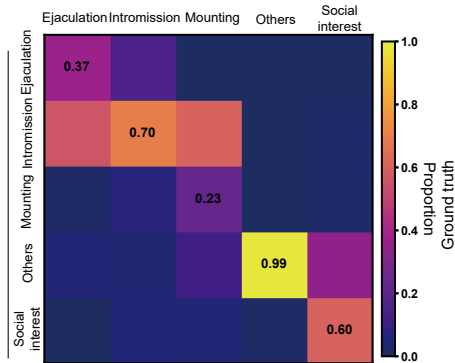

k-NN, diagonal value as precision

**C**

Inferred labels

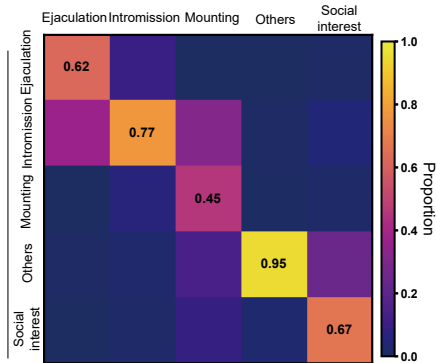

LightGBM, diagonal value as precision
