# Supplementary figures and images for: Selfee, self-supervised features extraction of animal behaviors
Source: eLife journal article supplement (doi:10.7554/elife.76218), 2022-06-16

**A**

DeepLabCut

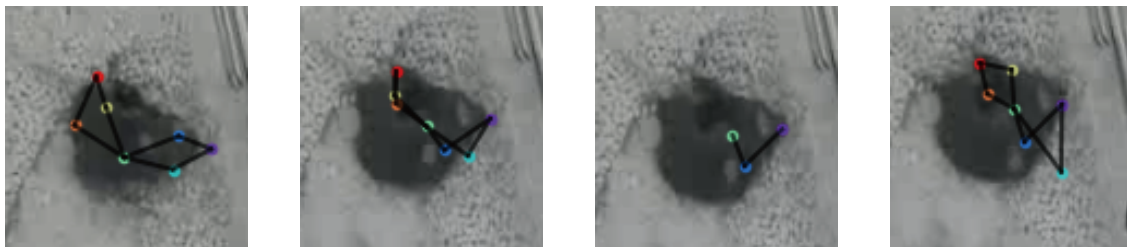**B**

FlyTracker

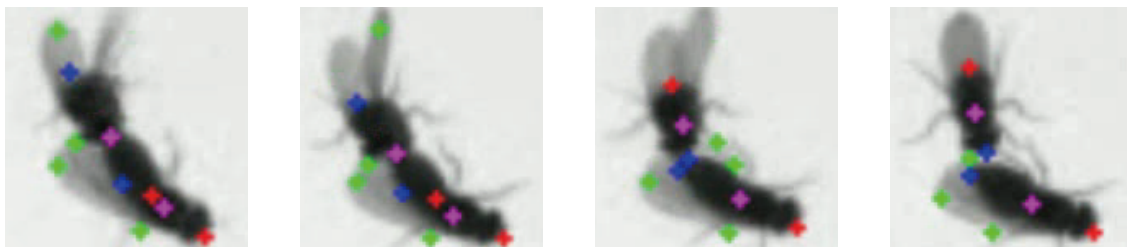**C**

SLEAP

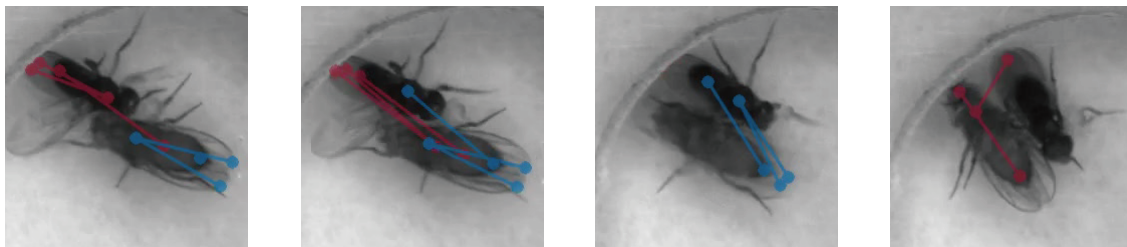

Supplement: supp [file elife-76218-supp-v1.zip]

**A**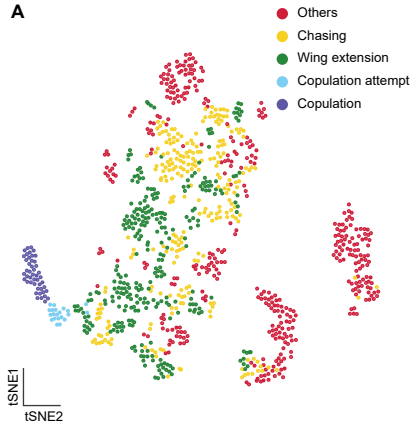

Distances between each key point

**B**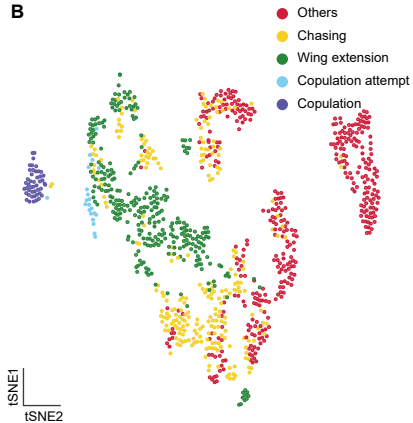

Human engineered features

Supplement: supp [file elife-76218-supp-v1.zip › elife_poa_e76218_Figure_1_figure_supplement_2.pdf]

**A****original**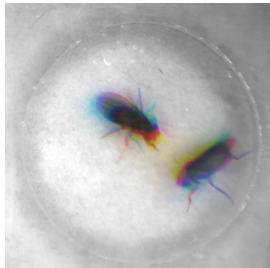**crop**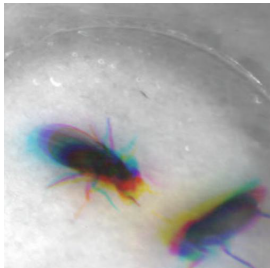**h-flip**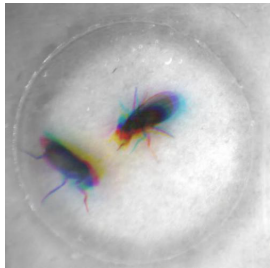**v-flip**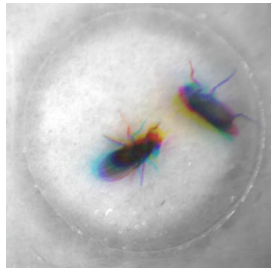**rotation**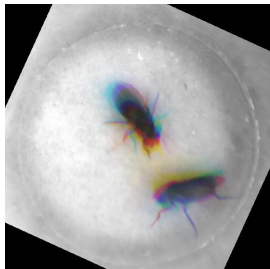**Turbo**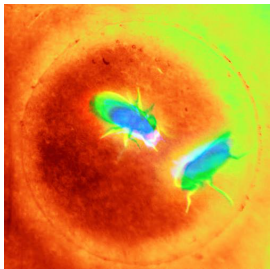**color jitter**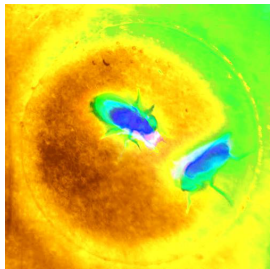**all applied**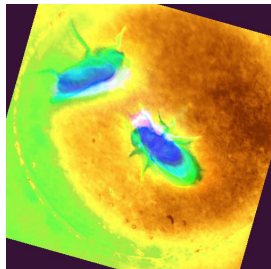

Supplement: supp [file elife-76218-supp-v1.zip › elife_poa_e76218_Figure_2_figure_supplement_1.pdf]

**A**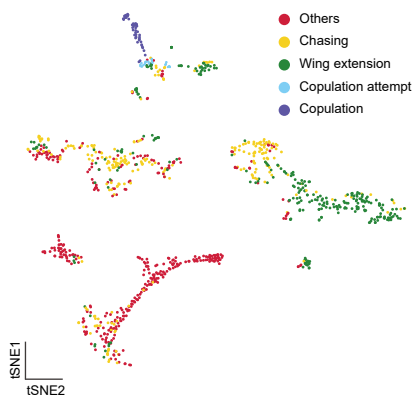**B**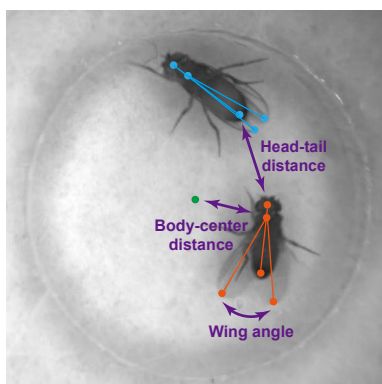**C**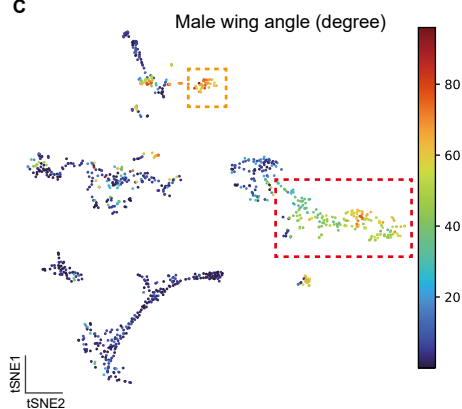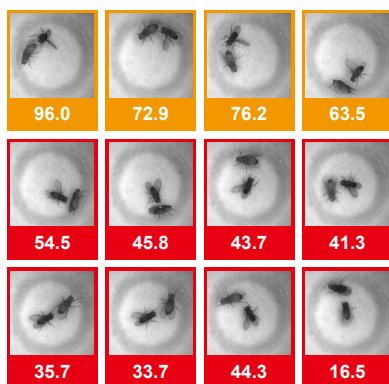**D**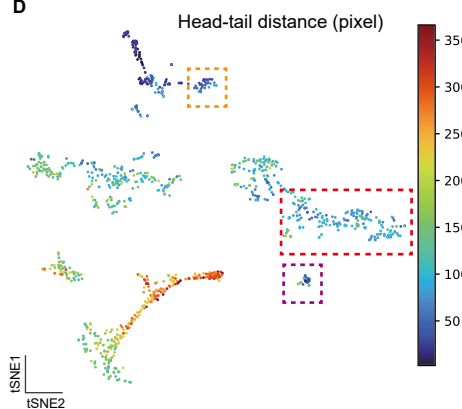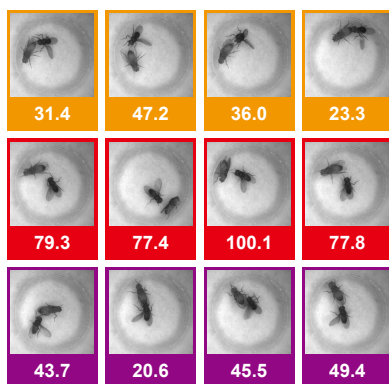**E**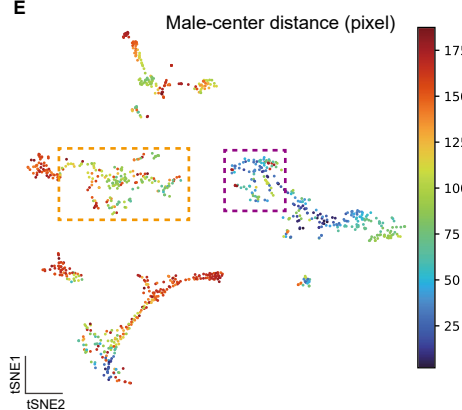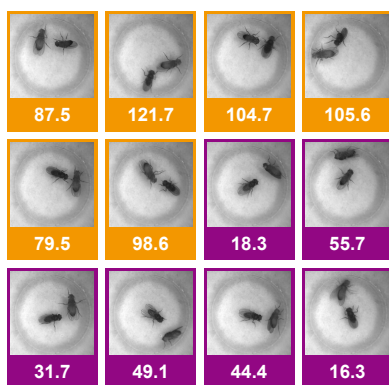

Supplement: supp [file elife-76218-supp-v1.zip › elife_poa_e76218_Figure_3_figure_supplement_1.pdf]

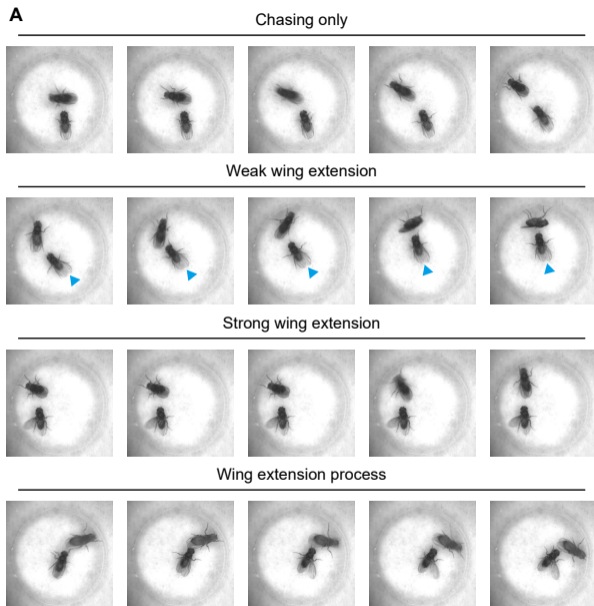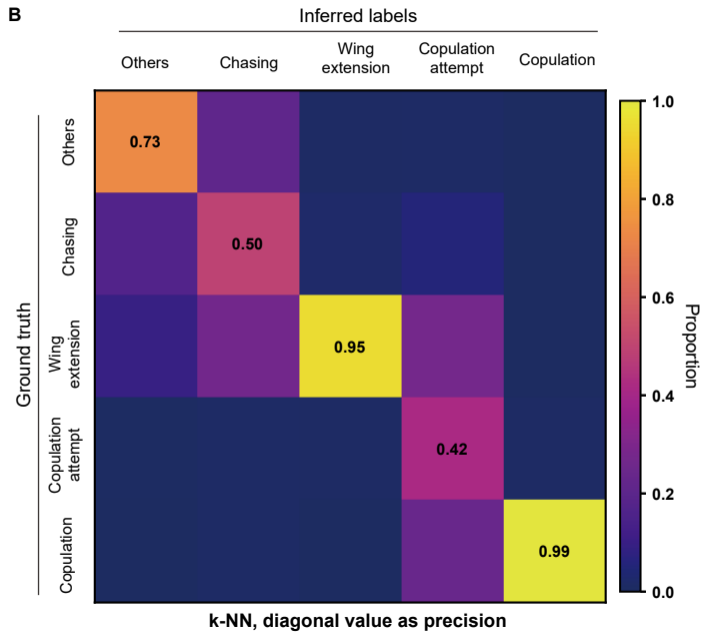

Supplement: supp [file elife-76218-supp-v1.zip › elife_poa_e76218_Figure_3_figure_supplement_2.pdf]

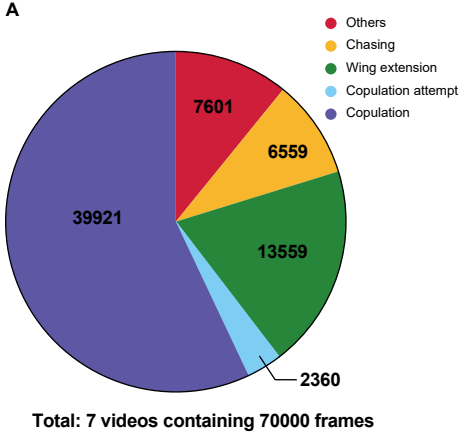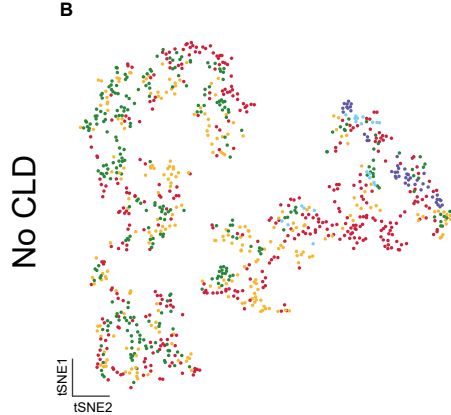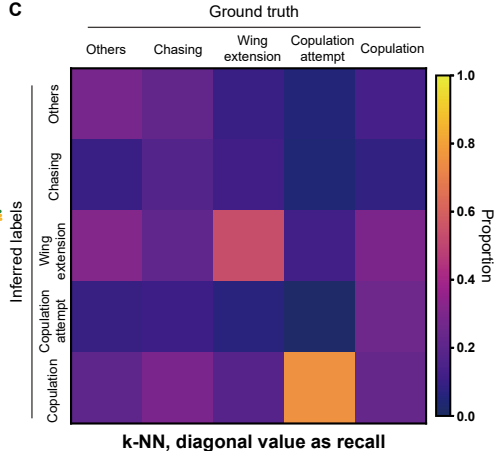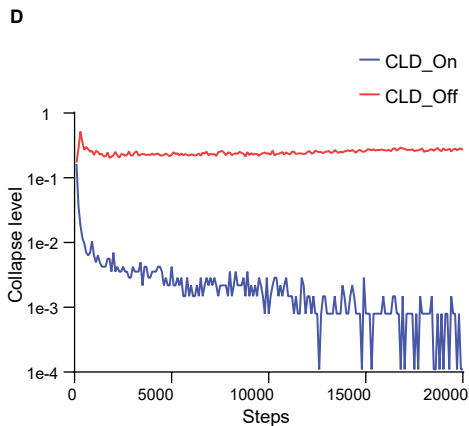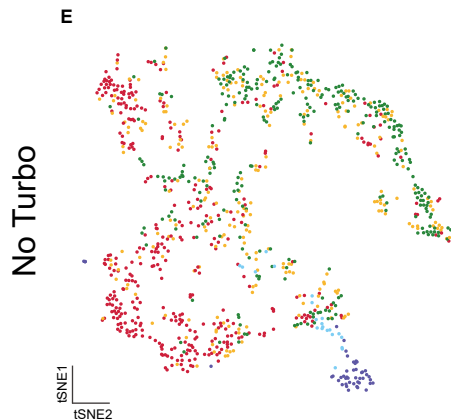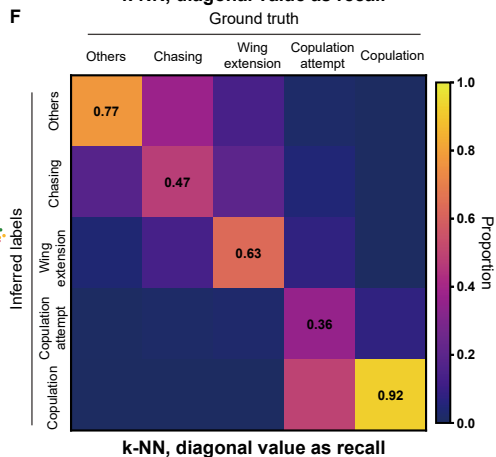

Supplement: supp [file elife-76218-supp-v1.zip › elife_poa_e76218_Figure_3_figure_supplement_5.pdf]

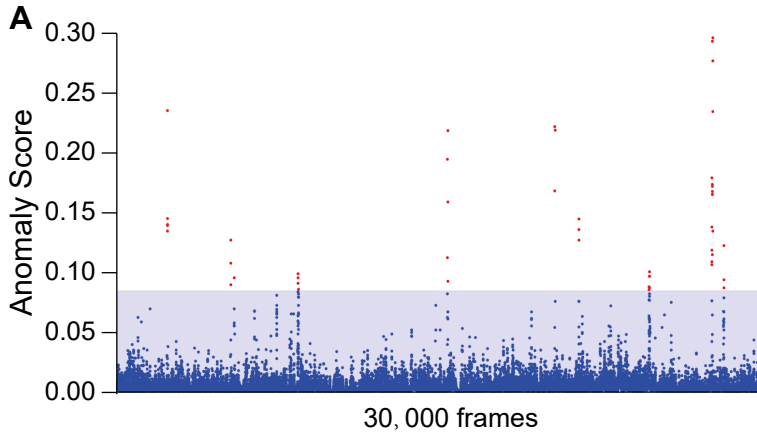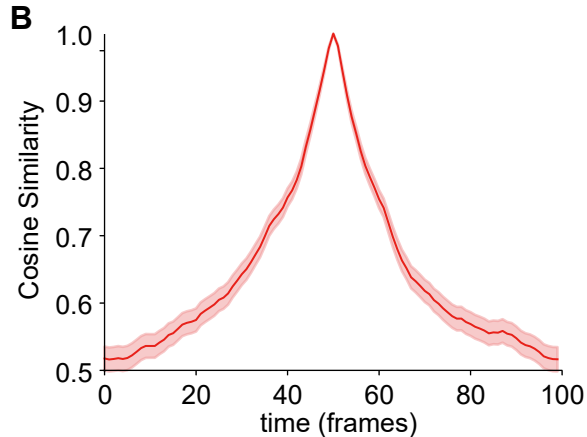

Supplement: supp [file elife-76218-supp-v1.zip › elife_poa_e76218_Figure_4_figure_supplement_1.pdf]

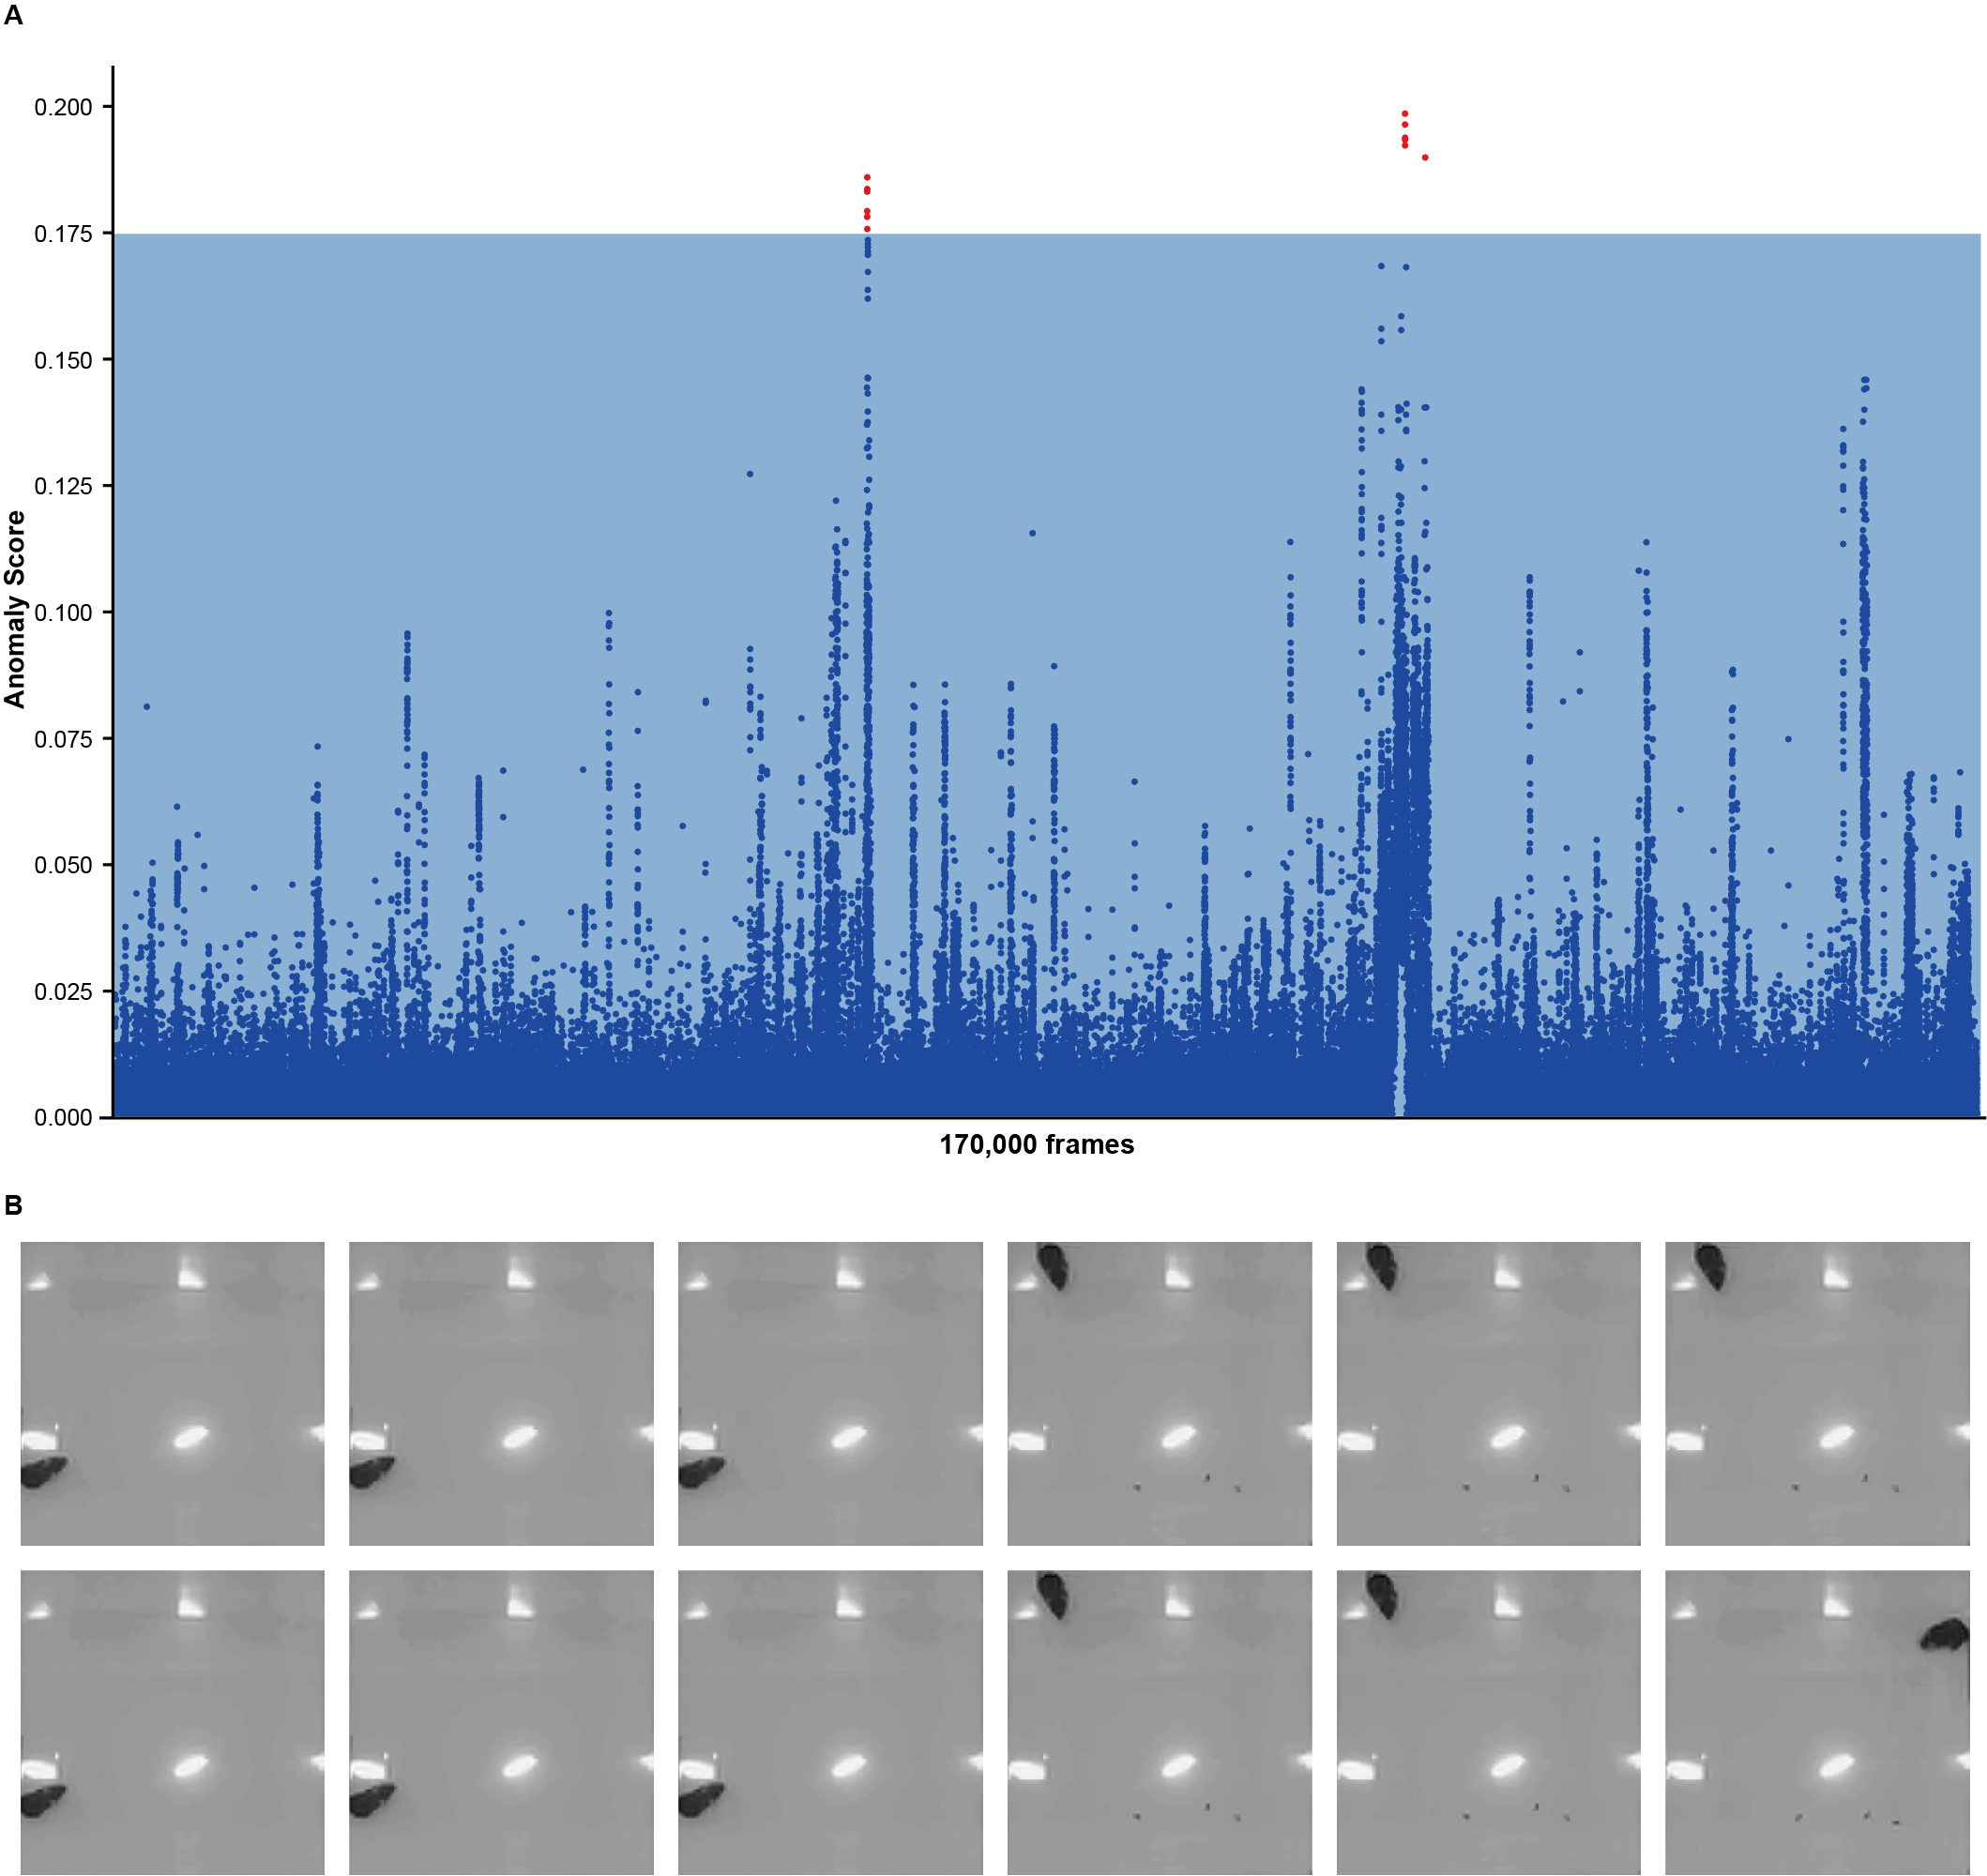

Supplement: supp [file elife-76218-supp-v1.zip › elife_poa_e76218_Figure_6_figure_supplement_1.jpg]

**A**

Selfee features

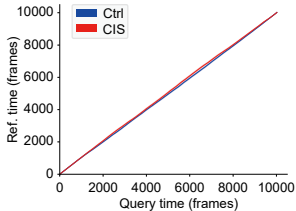**B**

Distances to the walls

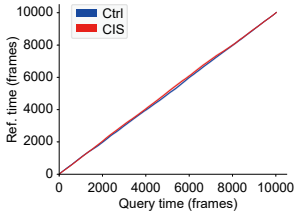

Supplement: supp [file elife-76218-supp-v1.zip › elife_poa_e76218_Figure_6_figure_supplement_2.pdf]
